# Supplementary material for: Bone Marrow Mesenchymal Stem Cell Extracellular Vesicle Treatment of Respiratory Failure from COVID-19: Endpoint Analysis of Expanded Access Safety Trial
Source: Research Square preprint supplement (doi:10.21203/rs.3.rs-8890163/v1), 2026-02-22
Supplement: Supplementary file 1 [file a08b545ae4d1b57321ffe10a.docx]

**SUPPLEMENTARY INFORMATION**

Bone Marrow Mesenchymal Stem Cell Extracellular Vesicle Treatment of Respiratory Failure from COVID-19: Endpoint Analysis of Expanded Access Safety Trial

Vikram Sengupta MD1, Sascha Qian MD1, John T. Ransom PhD1, Sam Suzuki MS MBA1, David J. Park MD2, Timothy I. Melson MD3, Brian P. Williams MD4, James J. Walsh MD5, Mustafa Awili MD6, Jack M. Mann MD7, Timothy A. Moseley PhD1

1Direct Biologics, LLC, 5301 Southwest Pkwy, Austin TX 78745

2St. Joseph Hospital Heritage, Fullerton, CA

3Helen Keller Hospital, Sheffield, AL

4Covenant Health, Lubbock, TX

5Donald Guthrie Foundation, Sayre, PA

6PRX Research, Mesquite, TX

7New York-Presbyterian Queens, NY

Corresponding author:

**Timothy A. Moseley, PhD**
Chief Scientific Officer

Direct Biologics, LLC

5301 Southwest Pkwy

Austin TX 78745

Phone: 617-901-9915

E-mail: [tmoseley@directbiologics.com](mailto:tmoseley@directbiologics.com)

ORCID: 0000-0003-1352-6610

Online Resource Table 6. IP Administration and Disposition (Safety Analysis Set).

|  | Statistics | (IP 15 mL up to 3 Doses) (N=103) |
| --- | --- | --- |
| IP IP 15 mL |  |  |
| Received 1 Dose | n (%) | 103 (100) |
| Received 2 Doses | n (%) | 75 (72.8) |
| Received 3 Doses | n (%) | 52 (50.5) |
|  | | |
| Days from Date of Hospitalization to Dose 1 (n=103) | Median | 2.13 |
|  | (1st, 3rd Quartiles) | (1.31, 5.19) |
|  | Min, Max | 0.4, 42.5 |
|  | | |
| Days from Dose 1 to Dose 2 (n=75) | Median | 2.94 |
|  | (1st, 3rd Quartiles) | (2.80, 3.04) |
|  | Min, Max | 2.6, 3.7 |
|  | | |
| Days from Dose 1 to Dose 3 (n=52) | Median | 5.95 |
|  | (1st, 3rd Quartiles) | (5.84, 6.03) |
|  | Min, Max | 5.7, 7.0 |
|  | | |
| #Subjects Who Did Not Receive A Full Dose at Any Dose (Dose 1, 2, or 3) | n (%) | 1 (1.0) |
|  | | |
| Reason for Not Receiving All 3 Doses [1] | n (%) | 51 (49.5) |
| Discharge from the Hospital | n (%) | 38 (36.9) |
| Adverse Event | n (%) | 1 (1.0) |
| Death | n (%) | 8 (7.8) |
| Unknown or Not Reaching Day 7 | n (%) | 4 (3.9) |
|  | | |
| Subjects Who Completed Study | n (%) | 63 (61.2) |
|  | | |
| Subjects Who Are Being Followed on Study | n (%) | 5 (4.9) |
|  | | |
| Reason for Discontinuation from Study Early | n (%) | 35 (34.0) |
| AE | n (%) | 0 |
| SAE | n (%) | 0 |
| Death | n (%) | 28 (27.2) |
| Lost to Follow-up | n (%) | 1 (1.0) |
| Physician Decision | n (%) | 0 |
| Protocol Deviation | n (%) | 0 |
| Withdrawal by Subject | n (%) | 6 (5.8) |
| Other | n (%) | 0 |

[1] Categorize the reason by the order: 1. Discharge occurred prior to the third dose, 2. AE.AEACN = 'Study Drug Withdrawn' occurring prior to the third dose, 3. Death prior to the third dose, 4. None of the above, but did not receive 3 doses.

Online Resource Table 7. Overall Summary of Safety by Number of Doses Received (Safety Analysis Set).

|  | (IP 15 mL up to 3 Doses) | | |
| --- | --- | --- | --- |
| Safety Parameter | Received 1 Dose (N=28) n (%) | Received 2 Doses (N=23) n (%) | Received 3 Doses (N=52) n (%) |
|  | | | |
| Any TEAEs [1] |  |  |  |
| Any Grade | 18 (64.3) | 15 (65.2) | 43 (82.7) |
| Grade 3 or 4 | 5 (17.9) | 2 (8.7) | 7 (13.5) |
|  | | | |
| Serious TEAEs [1] |  |  |  |
| Any Grade | 7 (25.0) | 9 (39.1) | 25 (48.1) |
| Grade 3 or 4 | 5 (17.9) | 2 (8.7) | 6 (11.5) |
|  | | | |
| IP-Related TEAEs | 0 | 1 (4.3) | 0 |
|  | | | |
| IP-Related Serious TEAEs | 0 | 0 | 0 |
|  | | | |
| TEAEs That Led to Dose Interruption | 0 | 1 (4.3) | 1 (1.9) |
|  | | | |
| TEAEs That Led to Missing Dose or Discontinued the Treatment Early | 0 | 1 (4.3) | 0 |
|  | | | |
| TEAEs That Led to Death | 2 (7.1) | 7 (30.4) | 19 (36.5) |
|  | | | |
| IP Infusion Reaction | 0 | 0 | 0 |
|  | | | |

TEAE = Treatment-Emergent Adverse Events, are defined as any adverse event that started between the first dose date and 30 days post the last dose date, inclusively.

[1] Toxicity grades of adverse events are evaluated based on criteria of NCI-CTCAE v5.0. Each subject is counted once to the worst grade at subject-level.

Note: Related = Definitely, Probably, or Potentially Related.

Online Resource Table 8. Overall Summary of Safety by Number of Doses Received (Safety Analysis Set - Subjects Who Died or Were Hospitalized up to Day 10).

|  | (IP 15 mL up to 3 Doses) | | |
| --- | --- | --- | --- |
| Safety Parameter | Received 1 Dose (N=5) n (%) | Received 2 Doses (N=7) n (%) | Received 3 Doses (N=40) n (%) |
|  | | | |
| Any TEAEs [1] |  |  |  |
| Any Grade | 5 (100) | 7 (100) | 35 (87.5) |
| Grade 3 or 4 | 2 (40.0) | 0 | 6 (15.0) |
|  | | | |
| Serious TEAEs [1] |  |  |  |
| Any Grade | 4 (80.0) | 7 (100) | 24 (60.0) |
| Grade 3 or 4 | 2 (40.0) | 0 | 5 (12.5) |
|  | | | |
| IP-Related TEAEs | 0 | 0 | 0 |
|  | | | |
| IP-Related Serious TEAEs | 0 | 0 | 0 |
|  | | | |
| TEAEs That Led to Dose Interruption | 0 | 1 (14.3) | 1 (2.5) |
|  | | | |
| TEAEs That Led to Missing Dose or Discontinued the Treatment Early | 0 | 1 (14.3) | 0 |
|  | | | |
| TEAEs That Led to Death | 2 (40.0) | 7 (100) | 19 (47.5) |
|  | | | |
| IP Infusion Reaction | 0 | 0 | 0 |
|  | | | |

TEAE = Treatment-Emergent Adverse Events, are defined as any adverse event that started between the first dose date and 30 days post the last dose date, inclusively.

[1] Toxicity grades of adverse events are evaluated based on criteria of NCI-CTCAE v5.0. Each subject is counted once to the worst grade at subject-level.

Note: Related = Definitely, Probably, or Potentially Related.

Online Resource Figure 3. Decline of Acute Phase Biomarkers Throughout the Study for patients remaining hospitalized. Serum levels of ferritin, neutrophils, C-reactive protein (CRP), and D-Dimer were measured by ELISA at Baseline and on days 4, 7, 10, 15, 29 and 61. Mean values for each biomarker were normalized to baseline (100%). On days 0, 4, 7, 10, 15, 29, 61, respectively, the number of remaining hospitalized patients with information available for each marker are: CRP 102, 96, 76, 56, 44, 34, 15; Ferritin 102, 95, 76, 54, 44, 34, 15; D-dimer 102, 95, 75, 56, 43, 33, 15; Neutrophils 99, 93, 69, 51, 43, 34, 15.
